# Supplementary material for: Whole-exome sequencing reveals the impact of UVA light mutagenesis in xeroderma pigmentosum variant human cells
Source: PubMed Central journal article supplement — Nucleic Acids Res. 2019 Dec 19;48(4):1941–53. doi: 10.1093/nar/gkz1182 (PMC7038989; doi:10.1093/nar/gkz1182), 2019-12-19
Supplement: gkz1182_supplemental_file.pdf [file gkz1182_supplemental_file.pdf]

## Whole-exome sequencing reveals the impact of UVA light mutagenesis in xeroderma pigmentosum variant human cells

Moreno and Souza et al. Supplementary data

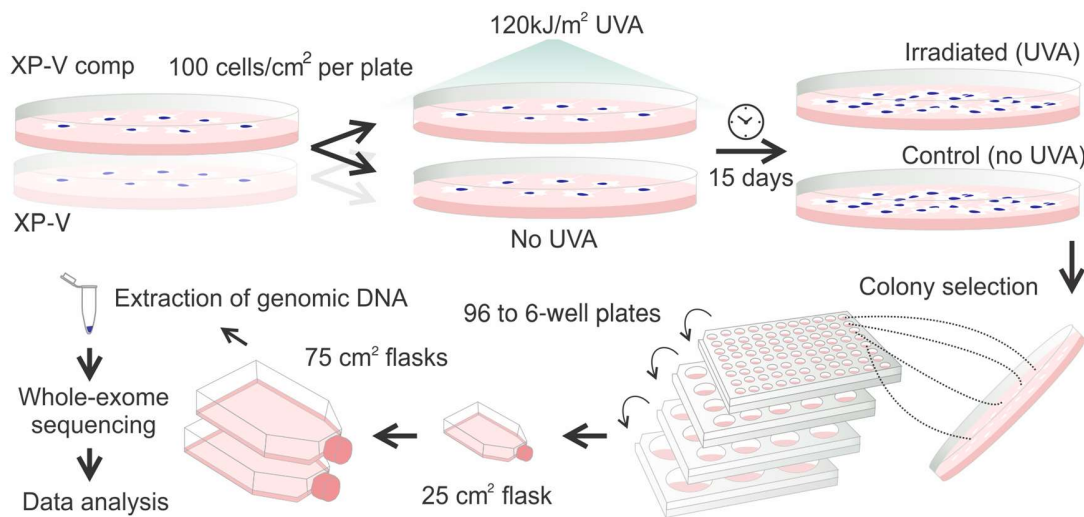

**Supplementary Figure 1. Experimental strategy to detect point mutations using whole-exome sequencing (WES).** XP-V complemented (XP-V comp), and XP-V cells (XP-V) were irradiated with 120 kJ/m<sup>2</sup> of UVA light and then subjected to a 45-day cloning procedure based on colony selection and expansion. Genomic DNA was extracted from four clones of each cell type and treatment. Whole-exome enrichment was performed to construct libraries for sequencing on HiSeq Platform. Read mapping and SNP calling were done using BWA-GATK pipeline.

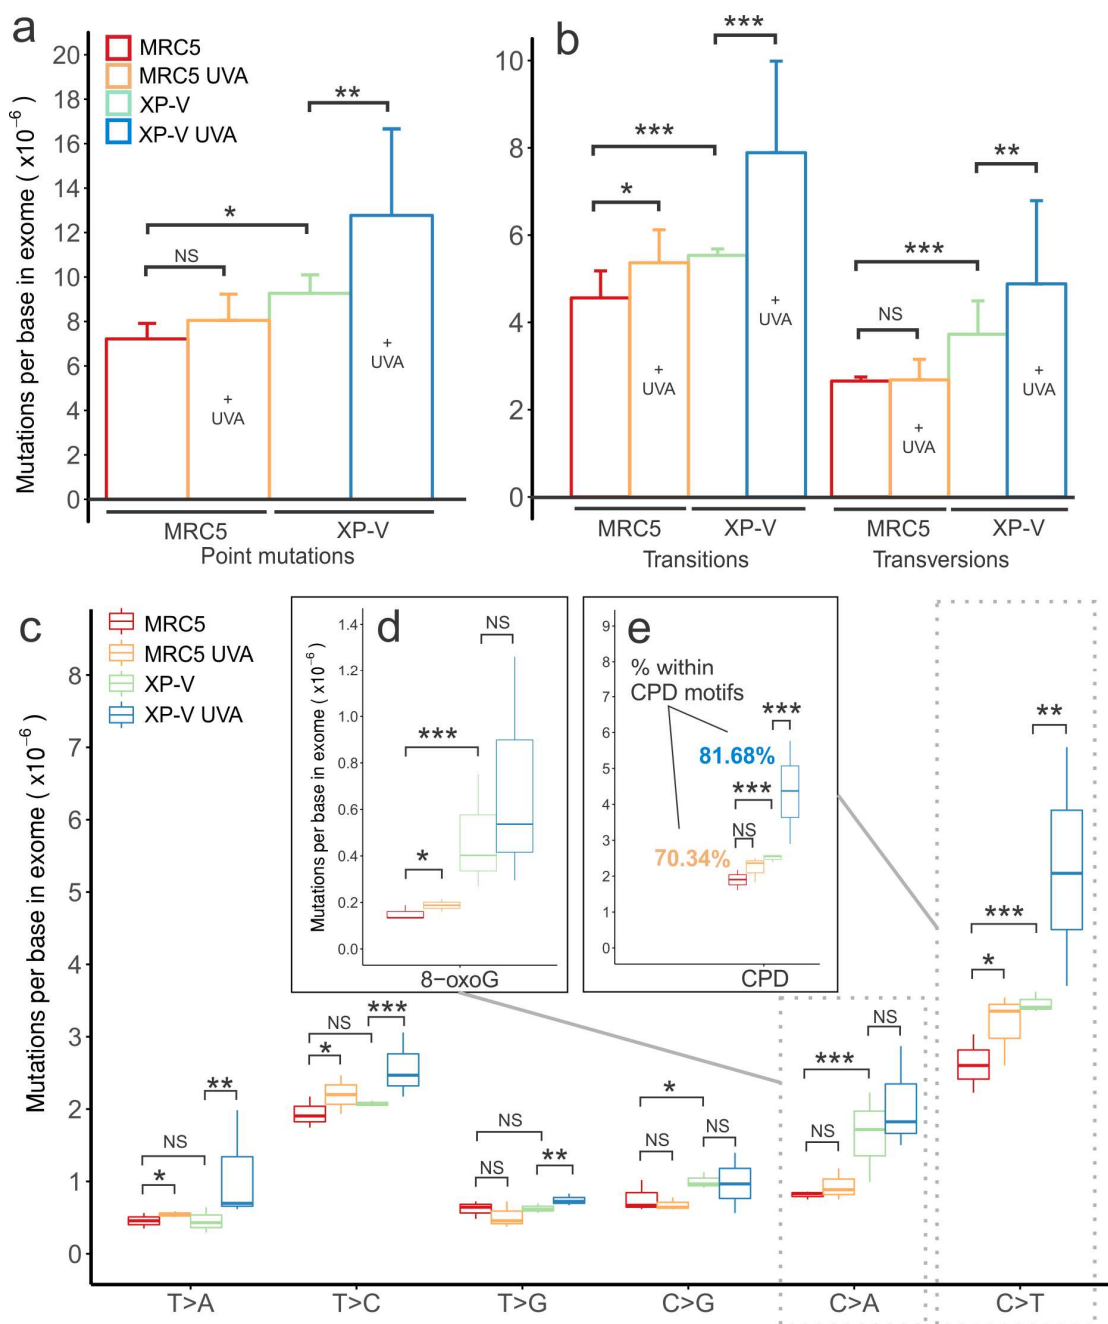

**Supplementary Figure 2. Point mutation profiles of MRC5 and XP-V cell-lines with UVA using SOLiD data sequencing.** (a) Total of point mutations per base in exome in all four groups of cell-lines sequenced. (b) Total of transitions and transversions per base in exome in the four groups of cell-lines. (c) T>A, T>C, T>G, C>G, C>A, and C>T mutations per base in exome. (d) Selection of all C>A mutations within RGR sequence motif beyond strand bias. (e) Selection of all C>T mutations within YY sequence (pyrimidine dimer) motif beyond strand bias. Statistical differences were calculated by non-parametric permutation tests:  $P < 0.01$  (\*\*\*),  $0.01 < P < 0.025$  (\*\*),  $0.025 < P < 0.05$  (\*),  $P > 0.05$  (NS). Data represent mean  $\pm$  SD. Y = IUPAC code for T or C nucleotides. R = IUPAC code for A or G nucleotides.

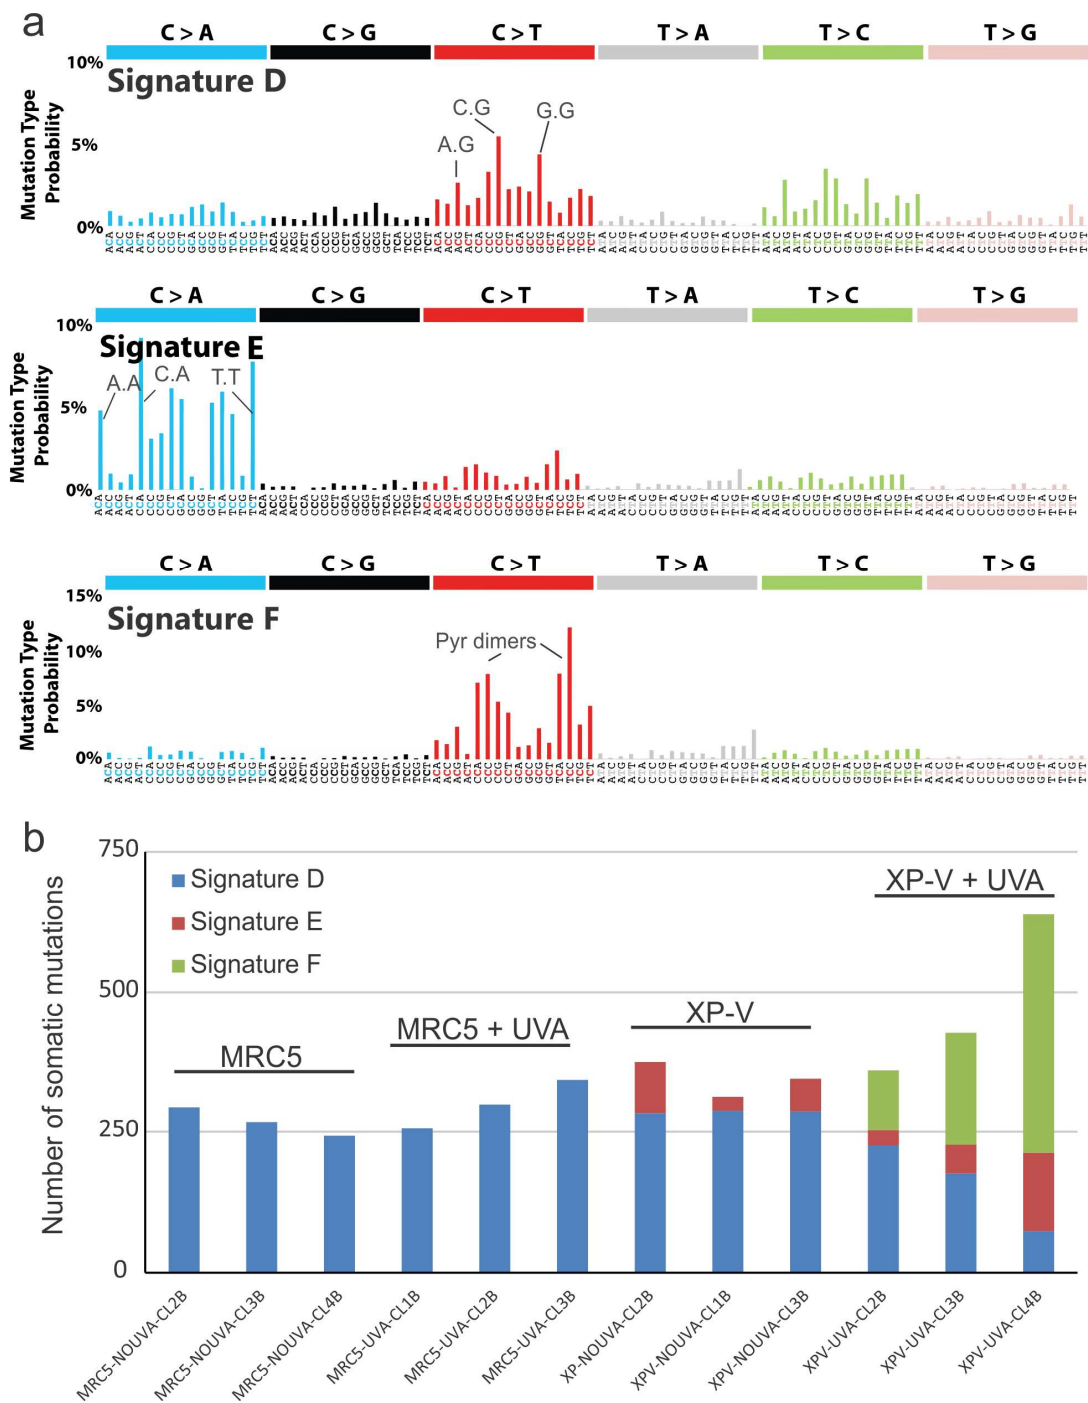

**Supplementary Figure 3. Mutational signatures extracted using SOLiD data sequencing from MRC5 and XP-V cell-lines.** Each clone was used in a signature analysis based on the framework based on the NMF method<sup>1</sup>. (a) Mutational signatures D, E, and F extracted using all clones of all cell-types. (b) Contribution of each of the three signatures extracted (D,E,F) in all samples sequenced.

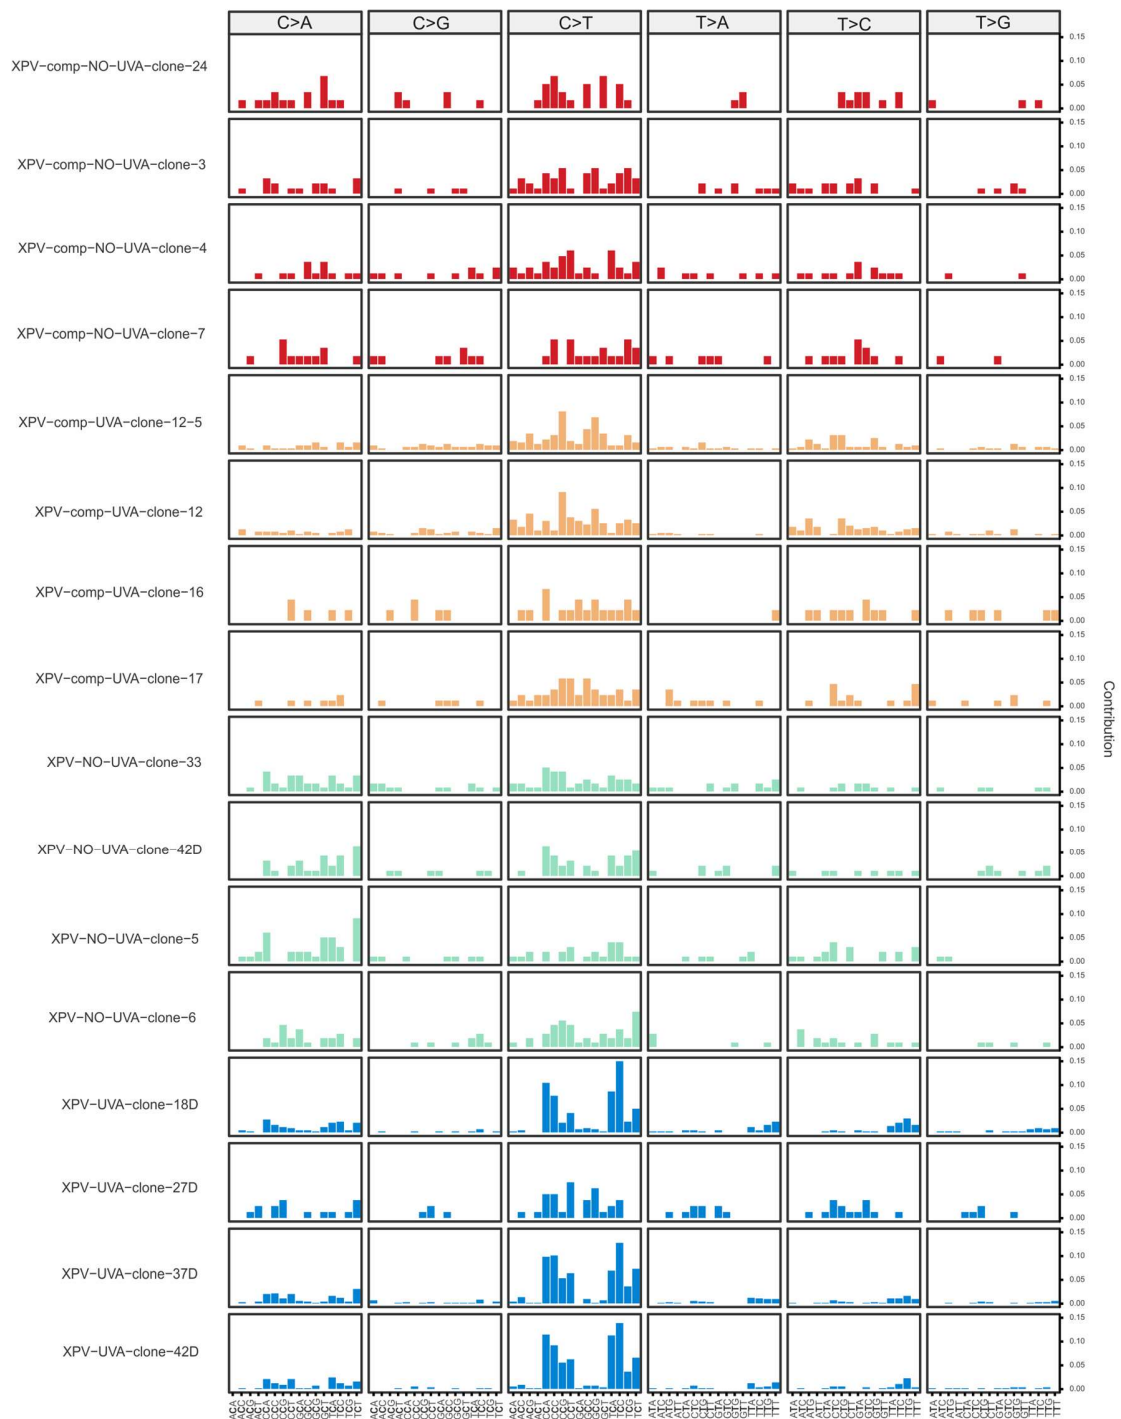

**Supplementary Figure 4. Somatic spectrum of mutations in each cell clone sequenced.** Somatic spectrum of point mutations and its trinucleotide context sequence extracted in each cell line clone. Clones colored in red, orange, light green and blue corresponds to XP-V comp, XP-V comp UVA, XP-V, and XP-V UVA, respectively. Trinucleotide contribution was calculated by its frequency.

**Supplementary Table 1. Sequencing, mapping, and SNP calling statistics of all clones sequenced using Illumina HiSeq platform and SureSelect exome enrichment kit.**

| Cell line | Treatment                                    | XP-V comp  |            |            |            |            |            |            |            | XP-V       |            |            |            |            |            |            |            |
|-----------|----------------------------------------------|------------|------------|------------|------------|------------|------------|------------|------------|------------|------------|------------|------------|------------|------------|------------|------------|
|           |                                              | No UVA     | No UVA     | No UVA     | No UVA     | UVA        | UVA        | UVA        | UVA        | No UVA     | No UVA     | No UVA     | No UVA     | UVA        | UVA        | UVA        | UVA        |
| Name      |                                              | Clone 4    | Clone 24   | Clone 3    | Clone 7    | Clone 12   | Clone 12-5 | Clone 16   | Clone 17   | Clone 5    | Clone 6    | Clone 42D  | Clone 33   | Clone 18D  | Clone 27D  | Clone 37D  | Clone 42D  |
|           | <b>Total reads</b>                           | 54179838   | 59284764   | 25094523   | 29006248   | 47909807   | 25693404   | 25866712   | 62072506   | 24737424   | 57247274   | 69301008   | 54410125   | 52802182   | 48115905   | 53244891   | 68190455   |
|           | <b>Number of reads mapped</b>                | 54021817   | 59075745   | 25074274   | 28986168   | 47758306   | 25671034   | 25834976   | 61820131   | 24713754   | 57038353   | 69074681   | 54206650   | 52640171   | 47959378   | 53080612   | 67940011   |
|           | <b>% reads mapped</b>                        | 99.71%     | 99.65%     | 99.92%     | 99.93%     | 99.68%     | 99.91%     | 99.88%     | 99.59%     | 99.90%     | 99.64%     | 99.67%     | 99.63%     | 99.69%     | 99.67%     | 99.69%     | 99.63%     |
|           | <b>Bases on target</b>                       | 5692399360 | 3675935895 | 2212490076 | 2642954163 | 4882986866 | 2513919062 | 2479714982 | 6783912997 | 2184064569 | 6104793803 | 7506421663 | 5870863777 | 5491025608 | 5038229178 | 5488468167 | 7142231902 |
|           | <b>Percent bases on target</b>               | 87.43%     | 88.07%     | 82.53%     | 85.80%     | 88.81%     | 89.55%     | 86.77%     | 88.23%     | 81.74%     | 88.10%     | 87.69%     | 87.30%     | 86.21%     | 88.36%     | 86.98%     | 87.59%     |
|           | <b>Bases off target</b>                      | 1021283832 | 1073441438 | 606302689  | 574600044  | 794955625  | 376121139  | 482075536  | 1155015976 | 623970993  | 1029770069 | 1321069719 | 1066841659 | 1093607496 | 840368568  | 1033709571 | 1281838642 |
|           | <b>Percent off target</b>                    | 12.57%     | 11.19%     | 17.47%     | 14.20%     | 11.19%     | 10.45%     | 13.23%     | 11.77%     | 18.26%     | 11.90%     | 12.31%     | 12.70%     | 13.79%     | 11.65%     | 13.02%     | 12.41%     |
|           | <b>Percent of target bp not covered</b>      | 2.72%      | 2.74%      | 2.94%      | 2.73%      | 2.76%      | 2.79%      | 2.87%      | 2.72%      | 2.91%      | 2.67%      | 2.67%      | 2.76%      | 2.73%      | 2.78%      | 2.90%      | 2.80%      |
|           | <b>Percent of target bp covered at ≥ 1X</b>  | 96.94%     | 96.69%     | 96.61%     | 96.91%     | 95.95%     | 96.73%     | 96.68%     | 96.88%     | 96.62%     | 97.04%     | 96.99%     | 96.83%     | 96.92%     | 96.79%     | 96.76%     | 96.92%     |
|           | <b>Percent of target bp covered at ≥ 10X</b> | 93.14%     | 92.93%     | 82.64%     | 86.21%     | 89.87%     | 84.07%     | 84.72%     | 92.96%     | 80.52%     | 93.76%     | 94.06%     | 92.74%     | 93.00%     | 91.70%     | 92.76%     | 94.10%     |
|           | <b>Percent of target bp covered at ≥ 20X</b> | 86.15%     | 86.98%     | 55.59%     | 64.26%     | 80.59%     | 59.96%     | 60.07%     | 87.42%     | 52.80%     | 86.92%     | 89.54%     | 85.87%     | 85.58%     | 83.13%     | 85.47%     | 89.48%     |
|           | <b>Average depth of coverage</b>             | 94.16      | 104.16     | 36.60      | 43.72      | 80.77      | 41.58      | 41.02      | 112.21     | 36.13      | 100.98     | 124.16     | 97.11      | 90.83      | 83.33      | 90.78      | 118.14     |
|           | <b>Raw variants called</b>                   | 49893      | 49823      | 48001      | 48582      | 47566      | 46658      | 48280      | 49895      | 48230      | 50858      | 51301      | 50905      | 51659      | 50485      | 51022      | 52309      |
|           | <b>Novel SNPs</b>                            | 1615       | 1550       | 1444       | 1452       | 1155       | 1090       | 1435       | 1672       | 1277       | 1386       | 1529       | 1517       | 2230       | 1416       | 2884       | 2554       |
|           | <b>Percent SNPs (dbSNP)</b>                  | 96.76%     | 96.89%     | 96.99%     | 97.01%     | 97.57%     | 97.66%     | 97.03%     | 96.65%     | 97.35%     | 97.27%     | 97.02%     | 97.02%     | 95.68%     | 97.20%     | 94.35%     | 95.12%     |
|           | <b>Raw Indels called</b>                     | 4573       | 4612       | 4079       | 4085       | 4480       | 4031       | 4097       | 4652       | 3965       | 4657       | 4779       | 4635       | 4660       | 4627       | 4521       | 4723       |
|           | <b>Novel Indels</b>                          | 369        | 368        | 317        | 301        | 342        | 288        | 294        | 383        | 298        | 348        | 393        | 348        | 358        | 370        | 361        | 348        |
|           | <b>Percent Indels (dbSNP)</b>                | 91.93%     | 92.02%     | 92.23%     | 92.63%     | 92.37%     | 92.86%     | 92.82%     | 91.77%     | 92.48%     | 92.53%     | 91.78%     | 92.49%     | 92.32%     | 92.00%     | 92.02%     | 92.63%     |
|           | <b>Exclusive SNVs</b>                        | 210        | 165        | 257        | 159        | 1209       | 849        | 143        | 221        | 270        | 243        | 221        | 304        | 919        | 198        | 1536       | 1206       |
|           | <b>Exonic/splicing exclusive SNVs</b>        | 83         | 59         | 93         | 57         | 396        | 321        | 45         | 86         | 99         | 108        | 93         | 119        | 441        | 80         | 754        | 578        |
|           | <b>Non-synonymous SNVs</b>                   | 55         | 40         | 61         | 35         | 196        | 180        | 33         | 57         | 78         | 76         | 61         | 80         | 280        | 54         | 461        | 362        |

**Supplementary Table 2. Sequencing, mapping, and SNP calling statistics of all clones sequenced using SOLiD 5500XL platform and TargetSeq exome enrichment kit.**

| Cell line                                                     | MRC5      |           |           |           |           |           | XP-V      |           |           |           |           |          |
|---------------------------------------------------------------|-----------|-----------|-----------|-----------|-----------|-----------|-----------|-----------|-----------|-----------|-----------|----------|
|                                                               | Treatment | UVA       | UVA       | UVA       | No UVA    | No UVA    | No UVA    | UVA       | UVA       | UVA       | No UVA    | No UVA   |
| Name                                                          | c11b      | c12b      | c13b      | c12b      | c13b      | c14b      | c12b      | c13b      | c14b      | c11b      | c12b      | c13b     |
| <b>Total reads</b>                                            | 138071194 | 132813002 | 137092092 | 122189552 | 124050652 | 133681560 | 117975188 | 116340286 | 122784478 | 127684938 | 124110282 | 99561778 |
| <b>Number of reads mapped</b>                                 | 119918359 | 115714515 | 120234337 | 108131487 | 110276082 | 116316194 | 104944385 | 102131864 | 107606654 | 112424729 | 109632143 | 87613550 |
| <b>% reads mapped</b>                                         | 86.85%    | 87.13%    | 87.70%    | 88.49%    | 88.90%    | 87.01%    | 88.95%    | 87.79%    | 87.64%    | 88.05%    | 88.33%    | 88.00%   |
| <b>Reads on target <sup>a</sup></b>                           | 50924905  | 50145243  | 50803594  | 51945436  | 53965486  | 48933172  | 51784896  | 49284839  | 51730897  | 55335029  | 52671532  | 41680620 |
| <b>Percent reads on target <sup>b</sup></b>                   | 51.97%    | 53.36%    | 51.92%    | 59.40%    | 60.48%    | 51.60%    | 60.27%    | 59.72%    | 58.94%    | 60.51%    | 58.77%    | 58.45%   |
| <b>Reads off target <sup>c</sup></b>                          | 47069615  | 43834724  | 47051761  | 35500717  | 35256362  | 45897518  | 34132925  | 33244696  | 36038989  | 36119306  | 36947990  | 29623578 |
| <b>Percent off target <sup>d</sup></b>                        | 48.03%    | 46.64%    | 48.08%    | 40.60%    | 39.52%    | 48.40%    | 39.73%    | 40.28%    | 41.06%    | 39.49%    | 41.23%    | 41.55%   |
| <b>Percent of target bp not covered: <sup>e</sup></b>         | 6.63%     | 6.43%     | 7.24%     | 6.55%     | 6.38%     | 6.93%     | 6.39%     | 6.04%     | 6.31%     | 5.90%     | 6.32%     | 7.02%    |
| <b>Percent of target bp covered at <math>\geq 1X</math>:</b>  | 93.37%    | 93.57%    | 92.76%    | 93.45%    | 93.62%    | 93.07%    | 93.61%    | 93.96%    | 93.69%    | 94.10%    | 93.68%    | 92.98%   |
| <b>Percent of target bp covered at <math>\geq 10X</math>:</b> | 80.44%    | 81.08%    | 79.18%    | 80.71%    | 81.47%    | 79.34%    | 81.32%    | 82.02%    | 81.61%    | 82.67%    | 81.55%    | 78.92%   |
| <b>Percent of target bp covered at <math>\geq 20X</math>:</b> | 71.24%    | 71.93%    | 70.17%    | 71.70%    | 72.65%    | 69.82%    | 72.46%    | 73.04%    | 72.98%    | 74.22%    | 72.82%    | 68.79%   |
| <b>Average depth of coverage <sup>f</sup></b>                 | 61.08     | 60.26     | 60.88     | 62.33     | 64.89     | 58.66     | 62.19     | 59.26     | 62.13     | 66.82     | 63.43     | 50.02    |
| <b>Raw variants called</b>                                    | 33363     | 33463     | 33226     | 33540     | 33784     | 32896     | 35796     | 35981     | 35648     | 36309     | 36022     | 34108    |
| <b>Exclusive SNVs</b>                                         | 639       | 694       | 859       | 722       | 697       | 669       | 835       | 961       | 1349      | 703       | 846       | 736      |
| <b>Exonic/splicing exclusive SNVs</b>                         | 256       | 300       | 344       | 295       | 269       | 243       | 361       | 428       | 639       | 314       | 376       | 346      |
| <b>Total non-synonymous SNVs</b>                              | 155       | 165       | 205       | 157       | 162       | 163       | 229       | 257       | 427       | 177       | 242       | 212      |

**Supplementary Table 3. Transcriptional strand bias score (SC) associated to mutagenic motifs.**

| Cell-line            | CPD         | 8-oxoG      | G to T      |
|----------------------|-------------|-------------|-------------|
| <b>XP-V comp</b>     | 0.97 ± 0.37 | 0.83 ± 0.33 | 0.81 ± 0.30 |
| <b>XP-V comp UVA</b> | 0.89 ± 0.35 | 0.63 ± 0.48 | 0.79 ± 0.58 |
| <b>XP-V</b>          | 1.47 ± 0.34 | 1.31 ± 0.24 | 0.79 ± 0.12 |
| <b>XP-V UVA</b>      | 1.48 ± 0.60 | 1.55 ± 1.66 | 1.04 ± 0.53 |

Transcriptional strand bias score (SC) is measured by concordance:discordance ratio for the number of mutational motifs detected in concordance (coding strand as annotated in RefSeq) and discordance (motifs found in the transcribed strand). A strand score of 1 means no transcriptional strand bias for a motif. Values > 1 means more motifs in concordance with coding strand but not subjected to TCR. Values < 1 means more motifs in the transcribed strand (discordance) and potentially subjected to TCR. CPD mutagenic motifs were defined as C>T changes in YY context sequences. 8-oxoG motifs were G>T changes in RGR motifs. Data represent mean ± SD. Y = IUPAC code for T or C nucleotides. R = IUPAC code for A or G nucleotides. Data represent mean ± SD.

**Supplementary Table 4. Mutations at T:A and C:G in XP-V comp and XP-V cells irradiated with UVA.**

| Cell-line            | T:A (10 <sup>-7</sup> ) | C:G (10 <sup>-7</sup> ) | C:G / T:A ratio | T:A at TT sites (10 <sup>-7</sup> ) |
|----------------------|-------------------------|-------------------------|-----------------|-------------------------------------|
| <b>XP-V comp</b>     | 3.6 ± 0.9               | 8.5 ± 2.1               | 0.58            | 2.2 ± 0.5                           |
| <b>XP-V comp UVA</b> | 10.9 ± 8.3              | 24.1 ± 20.2             | 0.55            | 7.4 ± 5.3                           |
| <b>XP-V</b>          | 4.4 ± 0.4               | 12.9 ± 1.5              | 0.66            | 3.4 ± 0.6                           |
| <b>XP-V UVA</b>      | 13.1 ± 6.1              | 63.5 ± 41.8             | 0.80            | 11.9 ± 6.1                          |

Data represent mean ± SD.

### **Supplementary Methods**

Color-space reads produced by SOLiD were mapped to the GRCh37/hg19 genome using the LifeScope v2.1 software package (Life Technologies, Carlsbad, California, EUA). SNP calling was performed by using the DiBayes algorithm to detect two adjacent SNPs. SNPs were called only if the altered allele supporting reads were higher than 0.15 and covered at least 2X.

To identify induced point mutations and filter out polymorphisms, unique single nucleotide variants (SNVs) were selected, considering the position and nucleotide change in comparison to all other samples sequenced, despite genotyping assignment. Whenever a variant was detected in two or more independent clones, it was considered a polymorphism and was discarded. Comparisons were performed using VCFtools, and unique SNVs for each sample were annotated with ANNOVAR using RefSeq. Alternatively, an additional filtering step involving only SNVs annotated as “exonic” or “splicing” in each clone sample was applied to restrict the analysis only to regions enriched in exome sequencing.

### **Supplementary Reference**

Alexandrov, L. B., Nik-Zainal, S., Wedge, D. C., Campbell, P. J. and Stratton, M. R. (2013) Deciphering signatures of mutational processes operative in human cancer. *Cell Rep.*, **3**, 246–259.
